# Supplementary material for: Ultrathin ZnTi-LDH nanosheets for photocatalytic aerobic oxidation of aniline based on coordination activation
Source: Royal Society of Chemistry journal article supplement (doi:10.1039/d0cy01721c), 2020-10-30
Supplement: d0cy01721c1.pdf [file d0cy01721c1.pdf]

## **Ultrathin ZnTi-LDH nanosheets for photocatalytic aerobic oxidation of aniline based on coordination activation**

Cheng Liu <sup>a</sup>, Wei Guo <sup>a</sup>, Jinsong Chen <sup>a</sup>, Junhua Zou <sup>a</sup>, Zhiwen Wang <sup>a</sup>, Ling Wu <sup>a,\*</sup>

<sup>a</sup> State Key Laboratory of Photocatalysis on Energy and Environment, Fuzhou  
University, Fuzhou 350116, PR China.

\* E-mail address: wuling@fzu.edu.cn (L. Wu).

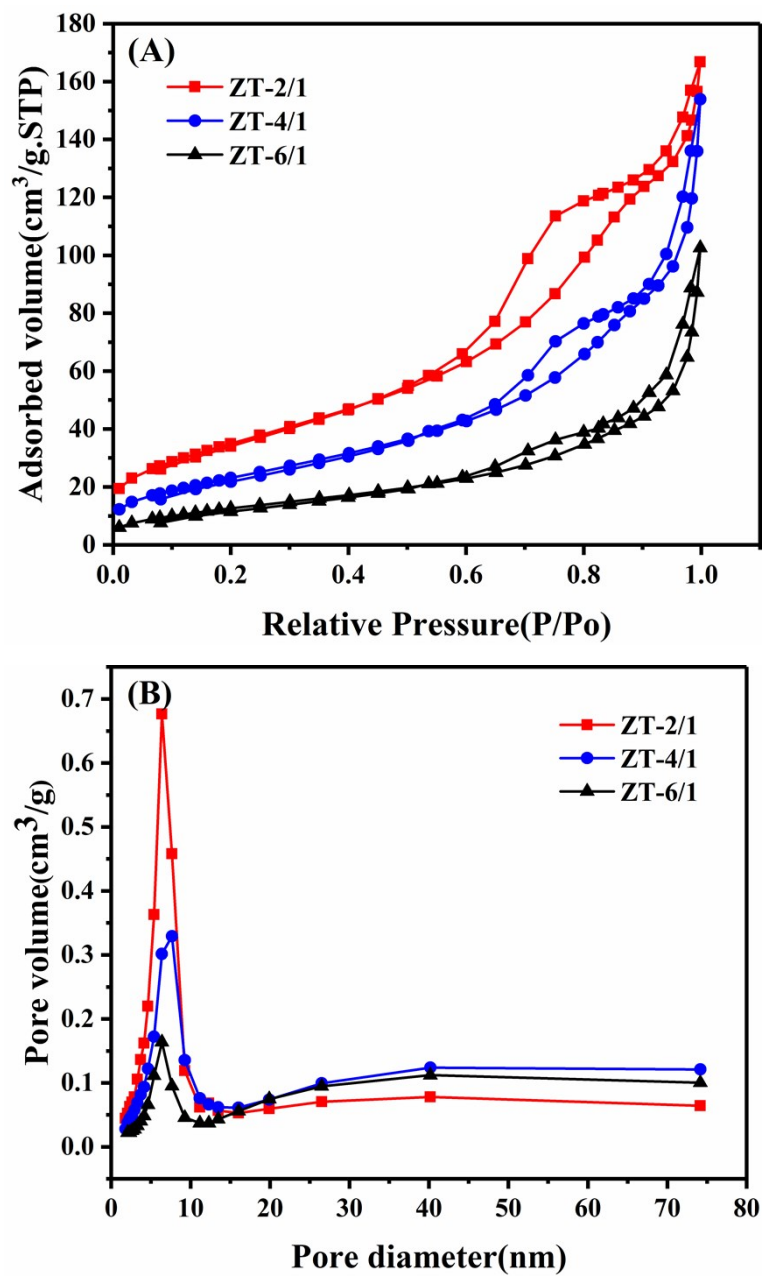

**Fig. S1** N<sub>2</sub>-sorption isotherms (A) and pore size distribution (B) of ZnTi-LDHs.

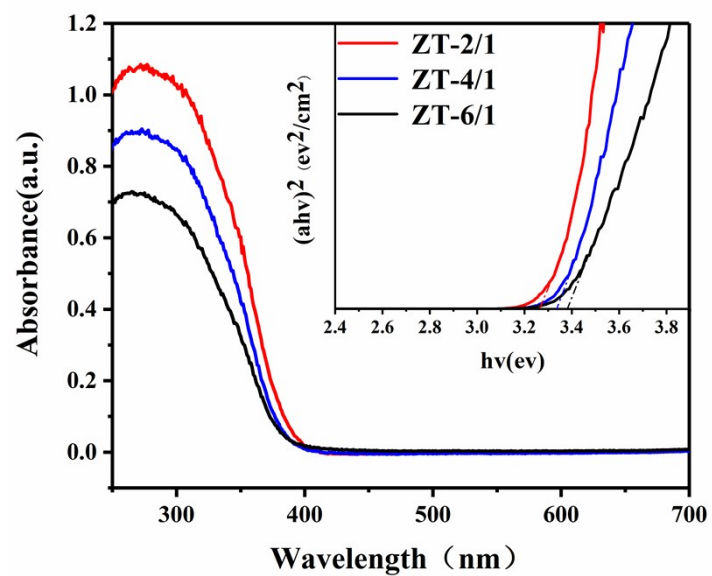

**Fig. S2** UV-vis DRS spectra and corresponding Tauc plot of ZnTi-LDHs.

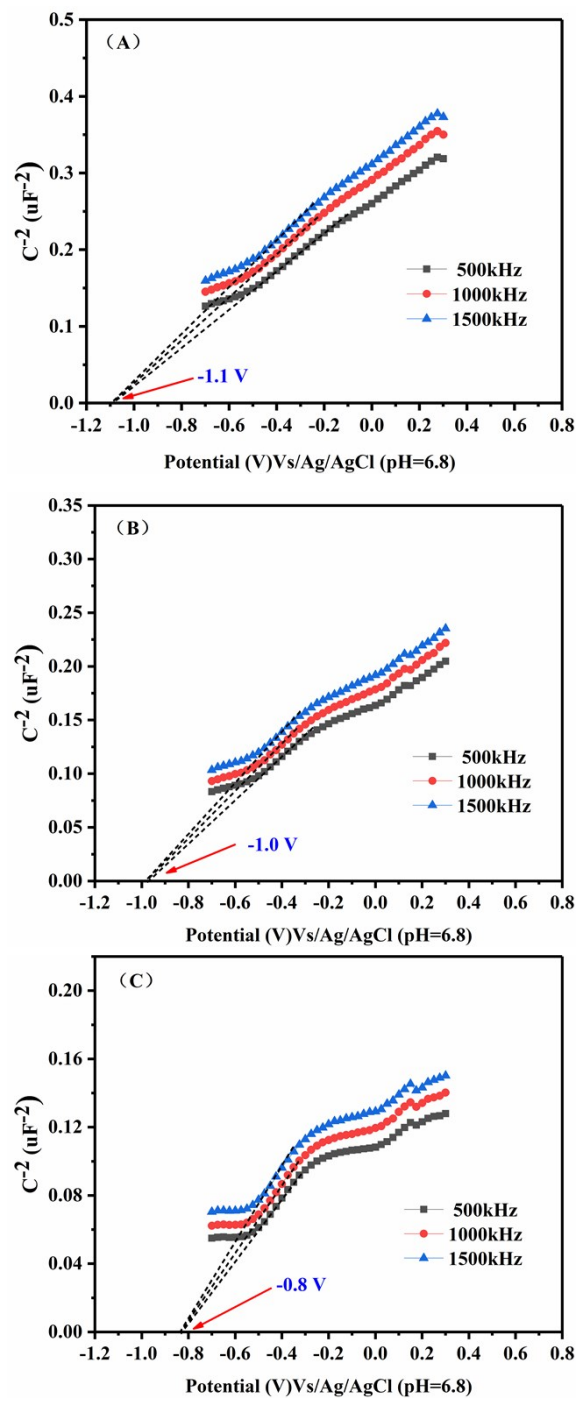

**Fig. S3** Mott-Schottky plots of ZT-2/1(A), ZT-4/1(B) and ZT-6/1(C).

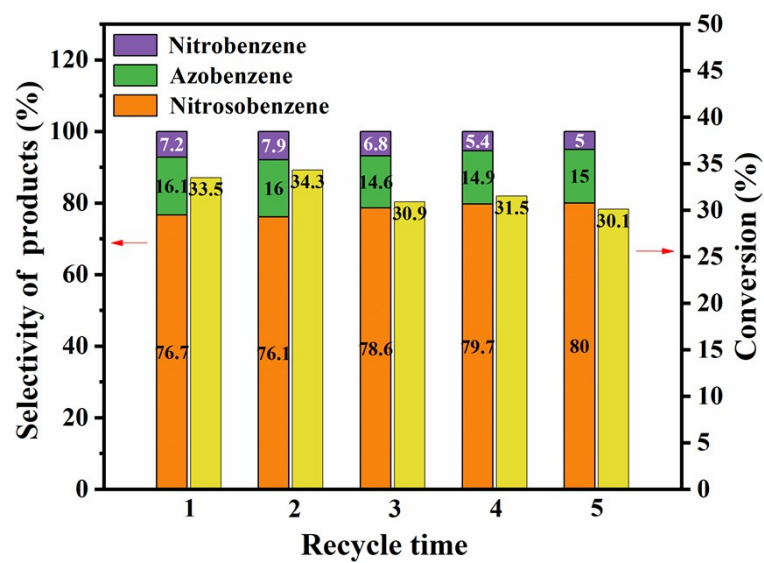

**Fig. S4** The reused of ZT-2/1 for five cycles.

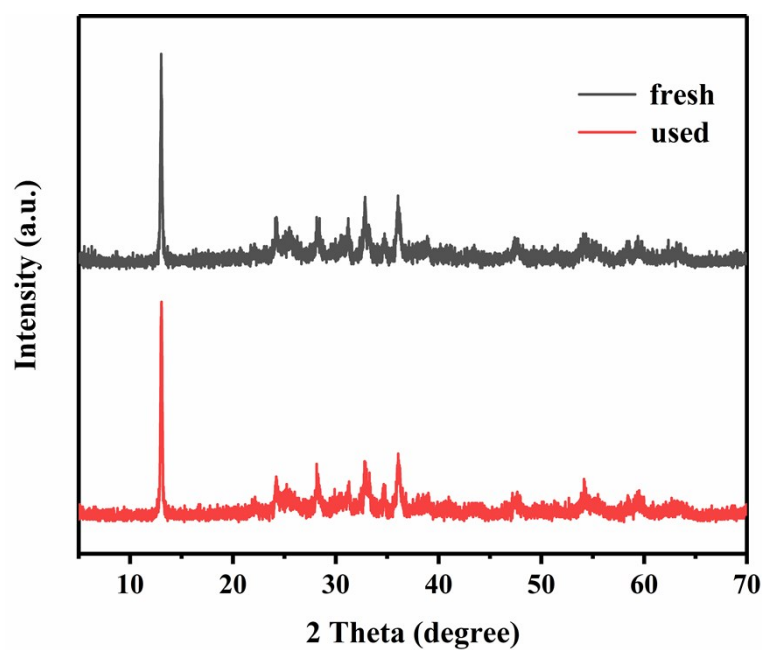

**Fig. S5** The XRD patterns of ZT-2/1 before and after five photocatalytic reactions.

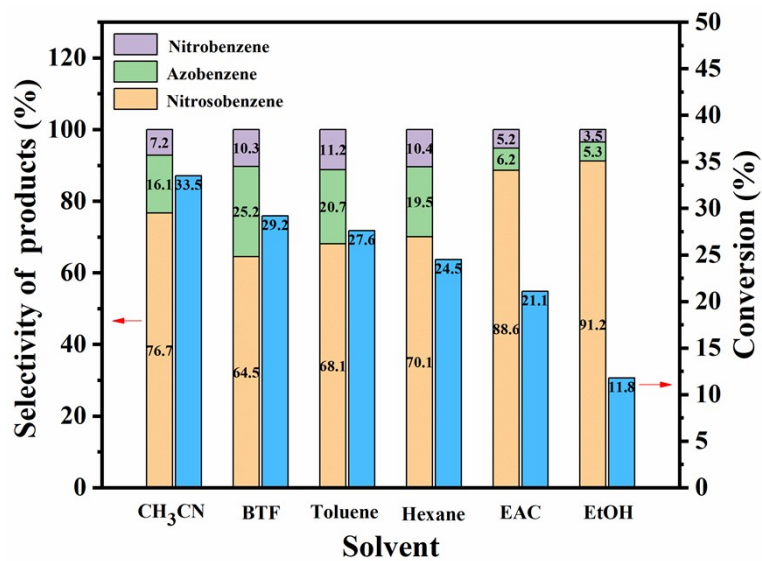

**Fig. S6** The effect of solvents on photocatalytic activity for ZT-2/1.

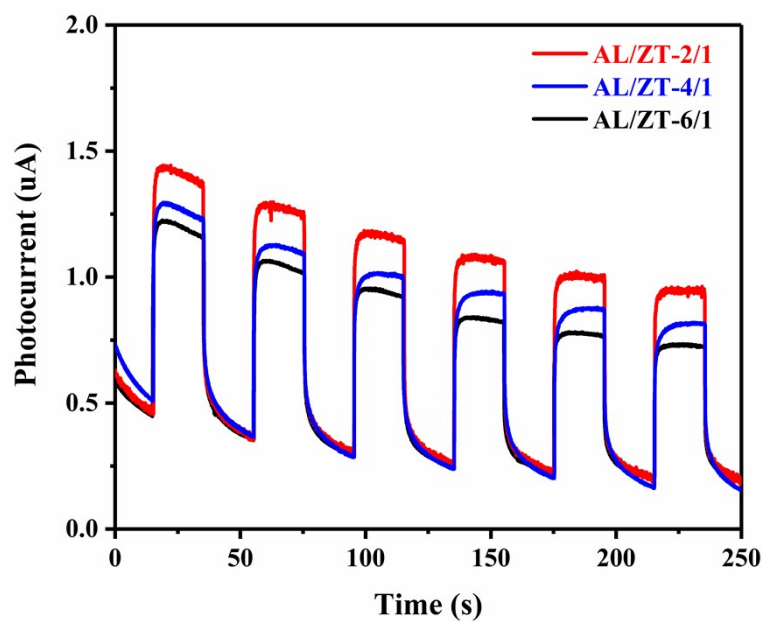

**Fig. S7** Photocurrent measurements of aniline-adsorbed ZnTi-LDHs under visible light irradiation.

**Table S1.** Comparison of various photocatalysts for the conversion of aniline and selectivity of nitrosobenzene.

| Entry | Catalysts            | Reaction condition                                 | Light source                        | Sele. | Conv.                        | Refer     |
|-------|----------------------|----------------------------------------------------|-------------------------------------|-------|------------------------------|-----------|
| 1     | Pt/P25               | O <sub>2</sub> , 12h, toluene as the solvent.      | a Xe lamp, $\lambda > 450$ nm       | 79.5% | No calculation, but very low | [1]       |
| 2     | MgO/TiO <sub>2</sub> | O <sub>2</sub> , 6h, toluene as the solvent,       | a 300 W Xe lamp, $\lambda > 400$ nm | 76%   | No calculation, but very low | [2]       |
| 3     | SrO/TiO <sub>2</sub> | O <sub>2</sub> , 4h, ethyl acetate as the solvent, | a 300 W Xe lamp, $\lambda > 400$ nm | 80%   | 29.6%                        | [3]       |
| 4     | ZT-2/1               | O <sub>2</sub> , 4h, acetonitrile as the solvent,  | a 300 W Xe lamp, $\lambda > 400$ nm | 76.7% | 33.5%                        | This work |

## Reference

[1] Y. Shiraishi, H. Sakamoto, K. Fujiwara, S. Ichikawa and T. Hirai, ACS Catal., 2014, 4, 2418–2425.

[2] J. Chen, J. Xiong, Y. Song, Y. Yu and L. Wu, Appl. Surf. Sci., 2018, 440, 1269–1276.

[3] J. Chen, C. Shen, B. Guo, Y. Yu and L. Wu, Catal. Today, 2019, 335, 312–318.
